# Supplementary material for: DNA replication fork speed underlies cell fate changes and promotes reprogramming
Source: PubMed Central journal article supplement (PMC8920892; doi:10.1038/s41588-022-01023-0), 2022-03-07

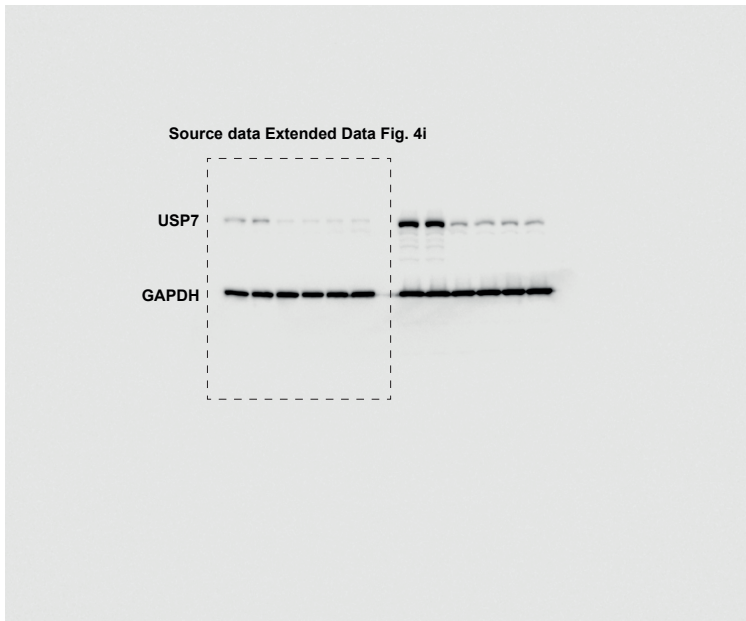

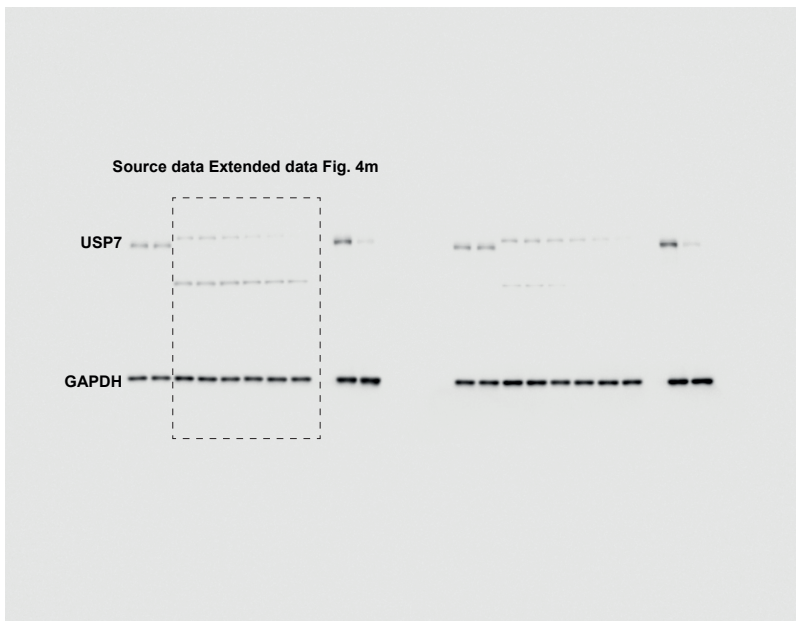

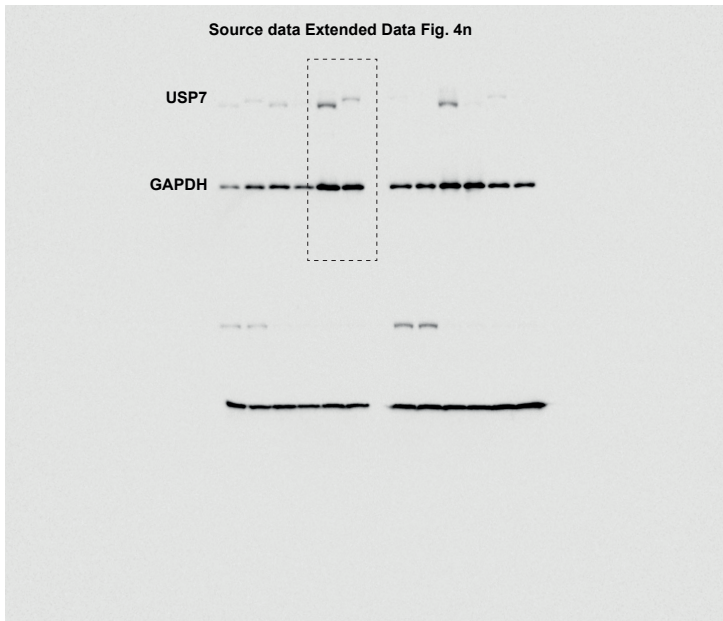

Supplement: 41588_2022_1023_MOESM5_ESM.pdf [file 41588_2022_1023_MOESM5_ESM.pdf]
